# Supplementary material for: Widely targeted metabolite profiling of mango stem apex during floral induction by compond of mepiquat chloride, prohexadione-calcium and uniconazole
Source: PeerJ. 2022 Dec 12;10:e14458. doi: 10.7717/peerj.14458 (PMC9753738; doi:10.7717/peerj.14458)
Supplement: Supplemental Information 7 [file peerj-10-14458-s007.xlsx]

## Sheet: Sheet1
Compounds	Index	Class I	Class II	A vs B	A vs C	B vs C	TA vs TB	TA vs TC	TB vs TC
L-Homocysteine	pme0057	Amino acids and derivatives	Amino acids and derivatives	0.300643	0.560821	0.260178	9.98278	10.682	0.699177
L-Histidine	mws0254	Amino acids and derivatives	Amino acids and derivatives	-0.14551	0.0453754	0.190886	1.60995	3.36657	1.75663
L-Homomethionine	Lmbp000123	Amino acids and derivatives	Amino acids and derivatives	-0.335467	-0.164124	0.171343	0.474535	4.56702	4.09248
Digallic acid	MWS20199	Phenolic acids	Phenolic acids	-0.41493	-0.191465	0.223466	1.69831	3.4752	1.77689
Vanillic Acid-4-O-Glucuronide	Jmwn002620	Phenolic acids	Phenolic acids	-0.254693	-0.617149	-0.362456	3.51671	6.73501	3.2183
1-O-Galloyl-2-O-Cinnamoyl-β-D-glucose	Lmsn005754	Phenolic acids	Phenolic acids	-0.336408	0.0858665	0.422275	4.85877	3.97753	-0.881238
2,3-Di-O-Galloyl-D-Glucose	Lmfn000797	Phenolic acids	Phenolic acids	-1.13414	0.0546635	1.1888	4.64134	5.38655	0.745212
LysoPC 16:2	pma1303	Lipids	LPC	-0.769774	-0.0507105	0.719063	1.5919	3.73524	2.14334
LysoPC 16:2(2n isomer)	pmb0863	Lipids	LPC	-0.746846	-0.118224	0.628622	1.58104	3.92636	2.34532
1,4,6-Tri-O-galloyl-β-D-glucose	Lmsn003088	Phenolic acids	Phenolic acids	-0.115321	-0.210785	-0.0954645	2.29398	4.52994	2.23596
1,3,6-Tri-O-galloyl-β-D-glucose	Lmsn003023	Phenolic acids	Phenolic acids	0.0347118	-0.016391	-0.0511028	2.84145	5.01603	2.17458
2,4,6-Tri-O-galloyl-D-glucose	Lmfn001062	Phenolic acids	Phenolic acids	-0.474652	0.120426	0.595078	2.50725	4.59061	2.08337
Nicotinic acid adenine dinucleotide	pmb0530	Nucleotides and derivatives	Nucleotides and derivatives	0.902635	0.755769	-0.146867	1.80219	3.56577	1.76359
1,2,3,6-Tetra-O-galloyl-β-D-glucose	Lmsn003625	Phenolic acids	Phenolic acids	-0.0511102	-0.0660573	-0.0149471	1.81853	4.18196	2.36343
